# Supplementary material
Source: PubMed Central journal article supplement (PMC4541608)

1 **Supplemental Information to:**

2 **Browning of Subcutaneous White Adipose Tissue in Humans**

3  
4 **EXPERIMENTAL PROCEEDURES**

5 ***Human and mouse sample collection***

6 sWAT samples were collected from the torso or limbs of healthy and severely  
7 burned children and adults during their scheduled surgeries while they were under  
8 general anesthesia. For burn patients, burn wounds were excised down to the healthy  
9 adipose tissue to provide a viable wound bed for skin grafting. sWAT samples were  
10 taken from the exposed healthy sWAT. sWAT was sampled from the torso or limbs  
11 depending on the location of the skin graft procedure. For healthy children and adults,  
12 sWAT samples were taken during their elective surgery from the same incision.

13 Subcutaneous fat was harvested from the abdomen (n=6), neck (n=1), lower back (n=2)  
14 and buttocks (n=1) of healthy children and the subcutaneous abdominal WAT of healthy  
15 adults (n=9). Human supraclavicular WAT was harvested from healthy adult humans by  
16 a positron emission tomography–computed tomography (PET-CT) guided percutaneous  
17 needle biopsy following acute (4-6hr) cold exposure and administration of the radio-  
18 active isotope <sup>18</sup>F-fluorodeoxyglucose. Subcutaneous WAT was sampled from the  
19 abdomen.

20 The intrascapular BAT of male balb-c mice (8-12 weeks) were harvested from animals  
21 immediately after euthanasia by exposure to a rising CO<sub>2</sub> concentration. Animals were  
22 housed in a 12-12 light dark cycle at ~ 25°C.

23

24

25 *Histology and immunohistochemistry analysis*

26         The sWAT samples were dehydrated, embedded in paraffin and cut into 5 µm  
27 sections. The slices were stained with hematoxylin and eosin for histology.  
28 Immunohistochemistry was performed according to a standard protocol. Upper airway  
29 mucus deposition in lung tissue of burn trauma victims. Shock 2008;29:356-61). Briefly,  
30 the paraffin was removed from the WAT sections with xylene and rehydrated with a  
31 series of alcohol solutions. For heat-induced epitope retrieval, the sections were  
32 immersed in a preheated citrate buffer solution at 95°C for 20 min. The sections were  
33 treated with hydrogen peroxide solution to mask the activity of endogenous peroxidase.  
34 After blocking with goat serum (rabbit IgG kit, Vector Laboratory, Burlingame, CA, USA)  
35 for 45 min, the sections were incubated overnight with the primary antibody (rabbit anti-  
36 UCP1 antibody, Sigma u6382, Sigma-Aldrich, St. Louis, MO, USA) at a dilution of  
37 1:1600 at 4°C. The following day, the sections were incubated with a secondary  
38 antibody (Rabbit IgG kit, Vector Laboratory, Burlingame, CA, USA), avidin-biotin -  
39 complex (ABC) solution, and then a diaminobenzidine solution (DAB peroxidase  
40 substrate kit, Vector Laboratory, Burlingame, CA, USA) at room temperature. We used  
41 phosphate-buffered saline with Tween 20 (0.2%) to wash sections between each step.  
42 The sections were counterstained with hematoxylin. We created negative control slides  
43 by substituting buffer for the primary antibody.

44

45 *Mitochondrial leak respiration*

46         sWAT samples (100-200 mg) for mitochondrial respiration analysis were placed  
47 in preservation medium (10 mM EGTA buffer containing 5.8 mM ATP, 6.6 mM MgCl<sub>2</sub>,

48 20 mM taurine, 20 mM imidazole, 0.5 mM dithiothreitol and 50 mM MES) and  
49 immediately transferred to the laboratory where they were blotted on filter paper and  
50 weighed. From each sample, approximately 50 mg of WAT was transferred to Oxygraph  
51 respirometer chambers (Oroboros Instruments GmbH, Innsbruck, Austria) and  
52 suspended in 2 ml of respiration medium (0.5 mM EGTA buffer containing 20 mM  
53 HEPES, 10 mM potassium phosphate, 60 mM potassium lactobionate, 3 mM  
54  $MgCl_2$ , 20 mM taurine, 110 mM sucrose and 1 mg/ml bovine serum albumin) (for human  
55 and mouse BAT measurements, 2-5 mg of tissue was used). After the chambers were  
56 sealed, 2  $\mu$ M digitonin was injected into each one to permeabilize the adipocyte cell  
57 membranes. All measurements were made at 37°C and at  $O_2$  concentration greater  
58 than 100 nmol/ml.

59

60 Briefly, after the oxygen flux had stabilized within the respirometry chambers,  
61 oligomycin insensitive uncoupled mitochondrial respiration was determined. To do this,  
62 pyruvate (5 mM), octanoyl-carnitine (1.5 mM), malate (2 mM), glutamate (10 mM),  
63 followed by ADP (5mM) and then succinate (10mM) were added to the Oxygraph  
64 chamber to achieve coupled state 3 respiration. Then 5 $\mu$ M oligomycin was titrated into  
65 the Oxygraph chamber to achieve leak state 4<sub>O</sub> respiration. In the results, we present  
66 state 4<sub>O</sub> respiration and the coupling control ratio for oligomycin, which was determined  
67 by dividing state 4<sub>O</sub> respiration by state 3 respiration.

68

69 *Activity of citrate synthase*

70 The activity of citrate synthase was measured as a proxy of mitochondrial  
71 density. Tissue homogenates (25 mg/ml) were prepared in 175 mM potassium chloride  
72 containing 2 mM EDTA and 1% Triton. Following homogenization (15-30 sec in a glass  
73 tissue grinder), the samples were frozen and thawed twice to ensure destruction of the  
74 cells and membranes. After subsequent centrifugation ( $3500 \times g$  for 2 min at  $4^{\circ}\text{C}$ ), the  
75 supernatants were recovered and stored at  $-80^{\circ}\text{C}$  until analysis. The maximum activity  
76 rates of citrate synthase were determined in extracts diluted 1:20 in a 0.1 M phosphate  
77 buffer (pH 7.1) containing 30 mM acetyl-CoA and 10 mM 5,5'-dithiobis-(2-nitrobenzoic  
78 acid) (DTNB). Following the addition of 10 mM oxaloacetate, light absorbance was  
79 monitored with a BioTek Eon™ spectrophotometer (Winooski, VT, USA) in a kinetic  
80 mode for 10 min at 412 nm. The free coenzyme A produced from the condensation of  
81 acetyl-CoA and oxaloacetate within the tricarboxylic acid cycle is bound to DTNB. The  
82 resulting change in light absorbance, detected at 412 nm, was used to determine the  
83 activity of citrate synthase (nmol/g/sec).

84

## 85 **Figure Legends**

86 ***Supplemental Figure 1. Whole body REE following burn trauma (related to Figure***  
87 ***4).***

88 Absolute REE strongly correlated with age **(A)** and body mass **(B)** in our patient cohort,  
89 but negatively correlated with age when normalized to body mass **(C)**. Indeed, when  
90 absolute REE was correlated with days post burn, no relationship between REE and  
91 days post burn was observed **(D)**. However, when REE was normalized to body mass,  
92 we found a significant correlation with REE and days post burn **(E)**.

93 Supplemental Figure 1.

94

95

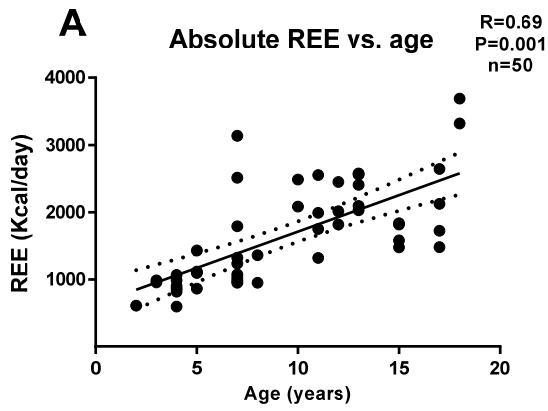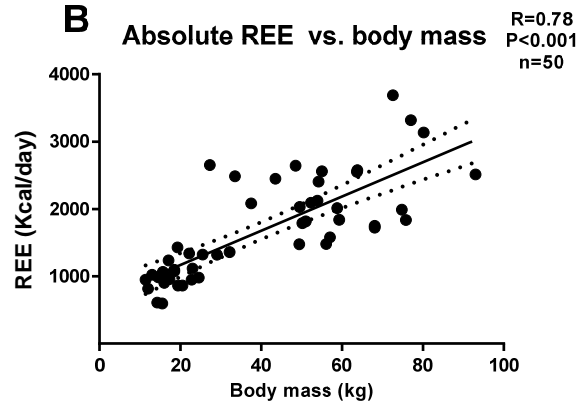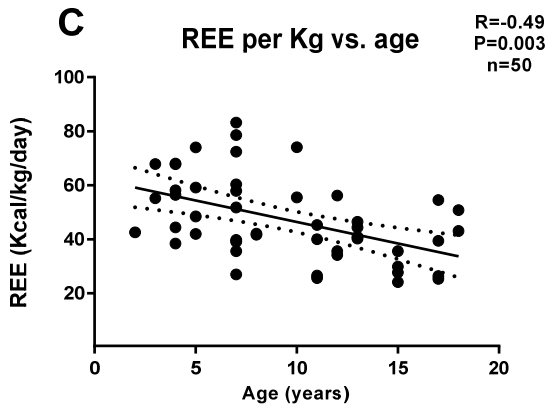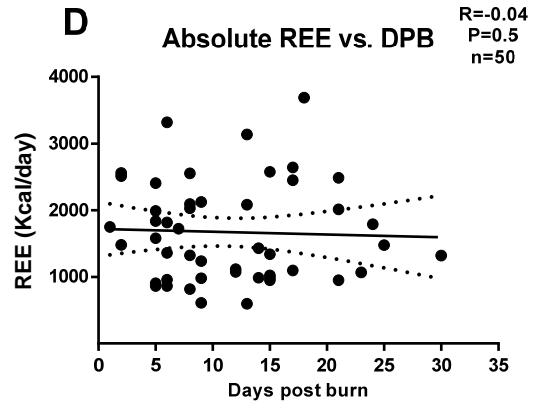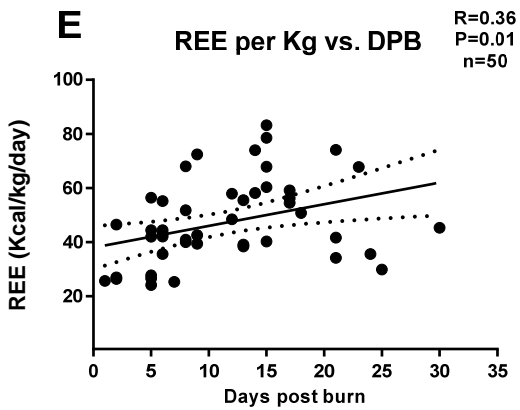

Supplement: NIHMS707521-supplement.pdf [file NIHMS707521-supplement.pdf]
